# Supplementary material for: Development of enantiospecific and chemoselective methods for the determination of praeruptorin A enantiomers and their metabolites in rat plasma using chiral and achiral LC-MS/MS
Source: Royal Society of Chemistry journal article supplement (doi:10.1039/c4ay00643g), 2014-01-01
Supplement: c4ay00643g1.pdf [file c4ay00643g1.pdf]

# Supplemental data

## **Development of the enantiospecific and chemoselective methods for determination of praeruptorin A enantiomers and their metabolites in rat plasma using chiral and achiral LC-MS/MS**

Yuelin Song <sup>a,b#</sup>, Wanghui Jing <sup>a#</sup>, Pengfei Tu <sup>b,c</sup>, Yi-Tao Wang <sup>a\*</sup>

### **Figure Legends**

**Figure S1** Mean (+ S.E.) plasma peak area ratio-time profiles of *d*PA after oral administration of PA (A) and *d*PA (B) (n = 6).

**Figure S2** Mean (+ S.E.) plasma peak area ratio-time profiles of D1 after oral administration of PA (A) and *d*PA (B) (n = 6).

**Figure S3** Mean (+ S.E.) plasma peak area ratio-time profiles of L3 after p.o. administration of PA (A) and *l*PA (B) (n = 6).

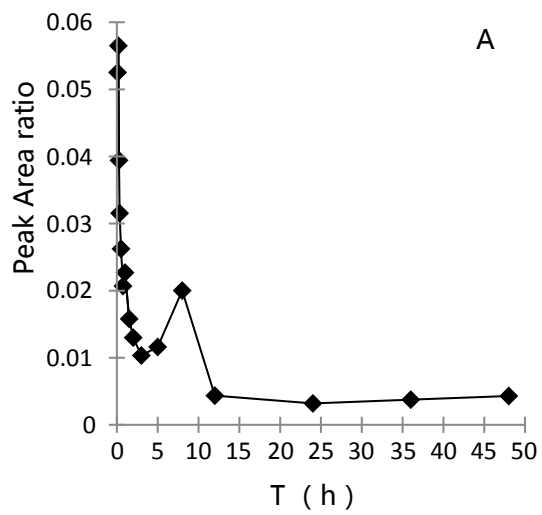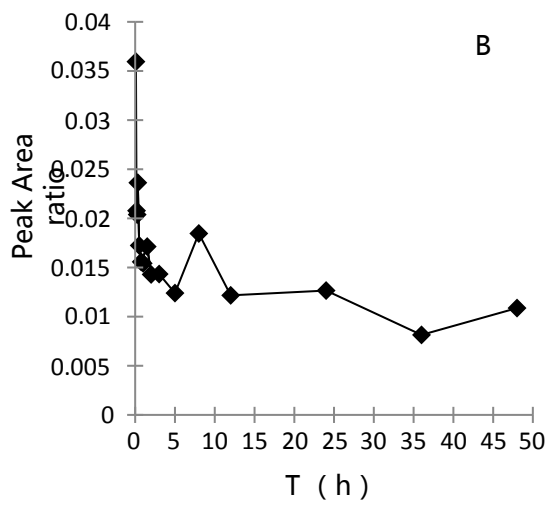

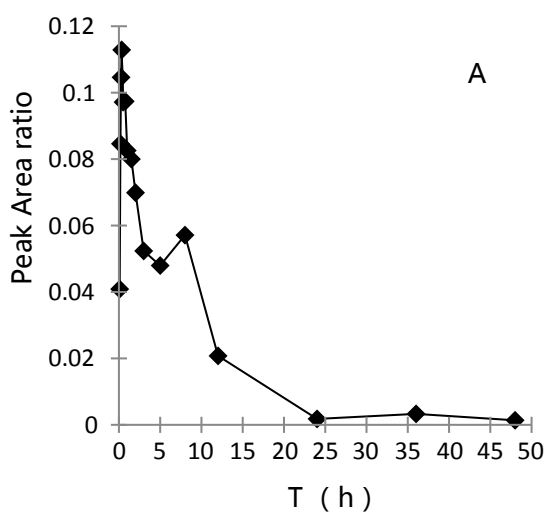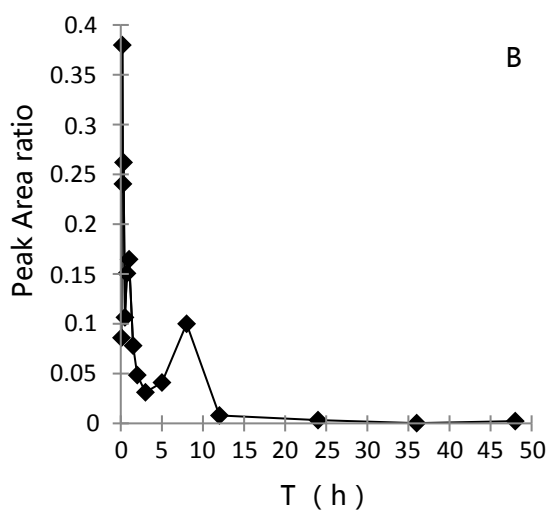

Figure S2

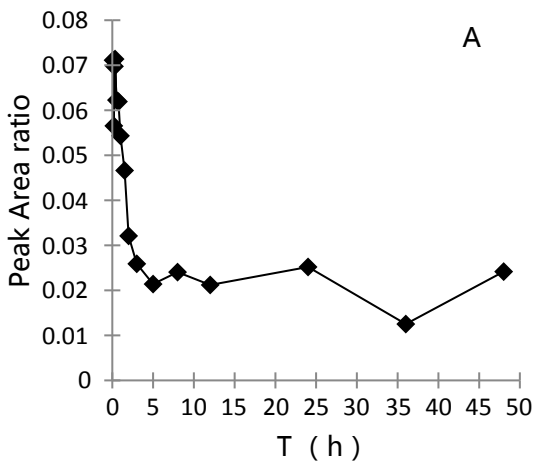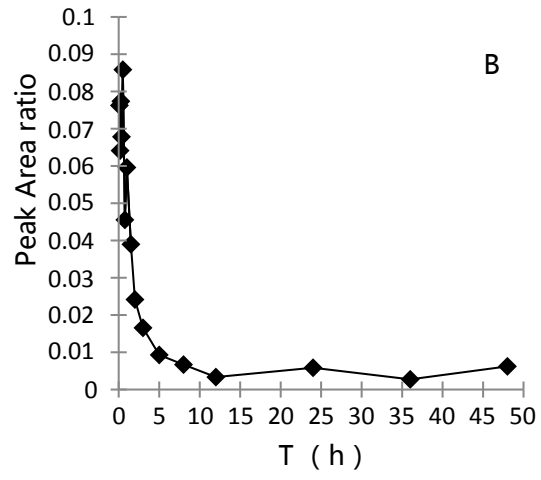

Figure S3
